# Supplementary material for: Design of a Plant-Based Yogurt-Like Product Fortified with Hemp Flour: Formulation and Characterization
Source: MDPI journal article supplement (doi:10.3390/foods12030485), 2023-01-20
Supplement: s1 [file s1]

**Supplementary Table S1.** Flour (rice and hemp) mixtures used in the production of mixtures for the preliminary evaluation of viscosity after gelatinization (80 °C for 15 min).

|                            | Total amount of flour                                  |                                                          |                                                          |                                                        |
|----------------------------|--------------------------------------------------------|----------------------------------------------------------|----------------------------------------------------------|--------------------------------------------------------|
| Hemp flour in substitution | 20%                                                    | 25%                                                      | 28%                                                      | 30%                                                    |
| 15%                        | Rice: 17g/100g<br>Hemp: 3g/100g<br>Water: 80g/100g     | Rice: 21.25g/100g<br>Hemp: 3.75g/100g<br>Water: 75g/100g | Rice: 23.8g/100g<br>Hemp: 4.2g/100g<br>Water: 72g/100g   | Rice: 25.5g/100g<br>Hemp: 4.5g/100g<br>Water: 70g/100g |
| 20%                        | Rice: 16g/100g<br>Hemp: 4g/100g<br>Water: 80g/100g     | Rice: 20g/100g<br>Hemp: 5g/100g<br>Water: 75g/100g       | Rice: 22.4g/100g<br>Hemp: 5.6g/100g<br>Water: 72g/100g   | Rice: 24g/100g<br>Hemp: 6g/100g<br>Water: 70g/100g     |
| 22%                        | Rice: 15.6g/100g<br>Hemp: 4.4g/100g<br>Water: 80g/100g | Rice: 19.5g/100g<br>Hemp: 5.5g/100g<br>Water: 75g/100g   | Rice: 21.84g/100g<br>Hemp: 6.16g/100g<br>Water: 72g/100g | Rice: 23.4g/100g<br>Hemp: 6.6g/100g<br>Water: 70g/100g |
| 25%                        | Rice: 15g/100g<br>Hemp: 5g/100g<br>Water: 80g/100g     | Rice: 18.75g/100g<br>Hemp: 6.25g/100g<br>Water: 75g/100g | Rice: 21g/100g<br>Hemp: 7g/100g<br>Water: 72g/100g       | Rice: 22.5g/100g<br>Hemp: 7.5g/100g<br>Water: 70g/100g |
